# Supplementary material
Source: PubMed Central journal article supplement (PMC4400541)
Supplement: supp_eru300_jexbot125674_file001.pdf [file supp_eru300_jexbot125674_file001.pdf]

Supplemental table 1 - Primer list for AGP promoter amplification and use in GUS/GFP fusions.

| Name  | Locus     | Primers                                                                           |
|-------|-----------|-----------------------------------------------------------------------------------|
| AGP1  | At5g64310 | <b>F CACCGTCATATTGACTCTGAGCCATAAACTC</b><br><b>R CAAAAAAGAGAGAGATTCTGAATTTAGC</b> |
| AGP9  | At2g14890 | <b>F CACCATTGGCCACAGTTCACCTGC</b><br><b>R TTTTGCTTTTGCTTTTCTCTCTG</b>             |
| AGP12 | At3g13520 | <b>F CACCGTTGGGGCCACATTTGTAGT</b><br><b>R CTTCTAAGTGCAAAAGAGGAG</b>               |
| AGP15 | At5g11740 | <b>F CACCCCATTTTCTTTGATTGTAGCAAGTTAG</b><br><b>R TTCAAAGATTTTGTGAGAGATAAAG</b>    |
| AGP23 | At3g57690 | <b>F CACCCATCGTGAATATTTATAGGACAAGTTTATG</b><br><b>R GAGACCTGAAAGGCTTTTCTTTTC</b>  |

Supplemental table 2 - Primer list for the Real Time RT-PCR experiment with the selected *AGPs*.

| Name     | Locus     | Primers                                                                          |
|----------|-----------|----------------------------------------------------------------------------------|
| AGP1-RT  | At5g64310 | <b>F</b> CAAAAACACTCCCAAACCAAA<br><b>R</b> GGTGGTGAAGCAGAGGATTC                  |
| AGP4-RT  | At5g10430 | <b>F</b> TCGCCACTTCAGCACTCGCTC<br><b>R</b> CGGGAGCACTGCTTGGGCTC                  |
| AGP7-RT  | At5g65390 | <b>F</b> GAACTAGCCCCGACACCTTC<br><b>R</b> ACAAGTGAACCGACGACGAA                   |
| AGP9-RT  | At2g14890 | <b>F</b> ATCTGTATCGTCCTCATCG<br><b>R</b> ATGTTGTGACTGGTGGTG                      |
| AGP10-RT | At4g09030 | <b>F</b> CTGCTCAACCTCCAAGAACC<br><b>R</b> CAAATCCGGCTAAAGATCCA                   |
| AGP12-RT | At3g13520 | <b>F</b> ACAACTCATCATTCGCACCA<br><b>R</b> GCATCGGAAGTAGGACTTGG                   |
| AGP15-RT | At5g11740 | <b>F</b> CTCAGCGTCTTTTCGTGTCAG<br><b>R</b> GCTTCGGAATACACACGAGAC                 |
| AGP16-RT | At2g46330 | <b>F</b> TCATCATTTTCGTCCGATCA<br><b>R</b> ACCACCATTAGCAAATACGC                   |
| AGP23-RT | At3g57690 | <b>F</b> AATGGAGATGAAGAAGATTG<br><b>R</b> TGCAAGTAGTAGCTGAAG                     |
| AGP25-RT | At5g18690 | <b>F</b> ACGAACGTTTTGGTTTTACG<br><b>R</b> TCAAGAGGGGCAAACACGAC                   |
| AGP26-RT | At2g47930 | <b>F</b> CAAGCGAAATGTCTCCTTCC<br><b>R</b> TGCTGCTTACTCGCTGTTTC                   |
| RUB1     | At4g36800 | <b>RT_147</b> CTGTTACGGAACCCAATTC<br><b>RT_148</b> TGTCGGTCAGACCTTTTTCC          |
| ACT8     | At1g49240 | <b>RT_861</b> CTCAGGTATTGCAGACCGTATGAG<br><b>RT_862</b> CAGAGTATGATGAAGCAGGTCCAG |

Supplemental figure 1 – Phylogenetic analysis of the AGP family in *A. thaliana*. To generate the phylogenetic tree for AGPs, the 3 blocks of most conserved amino acid sequences of AGPs coding sequences were aligned using Clustal W and manually edited using Jalview to reduce gaps. Neighbor-joining (NJ) tree was generated using the MEGA4 program. AGPs selected for further analysis are indicated by a yellow circle (classical AGPs) and a violet square (AG peptides).

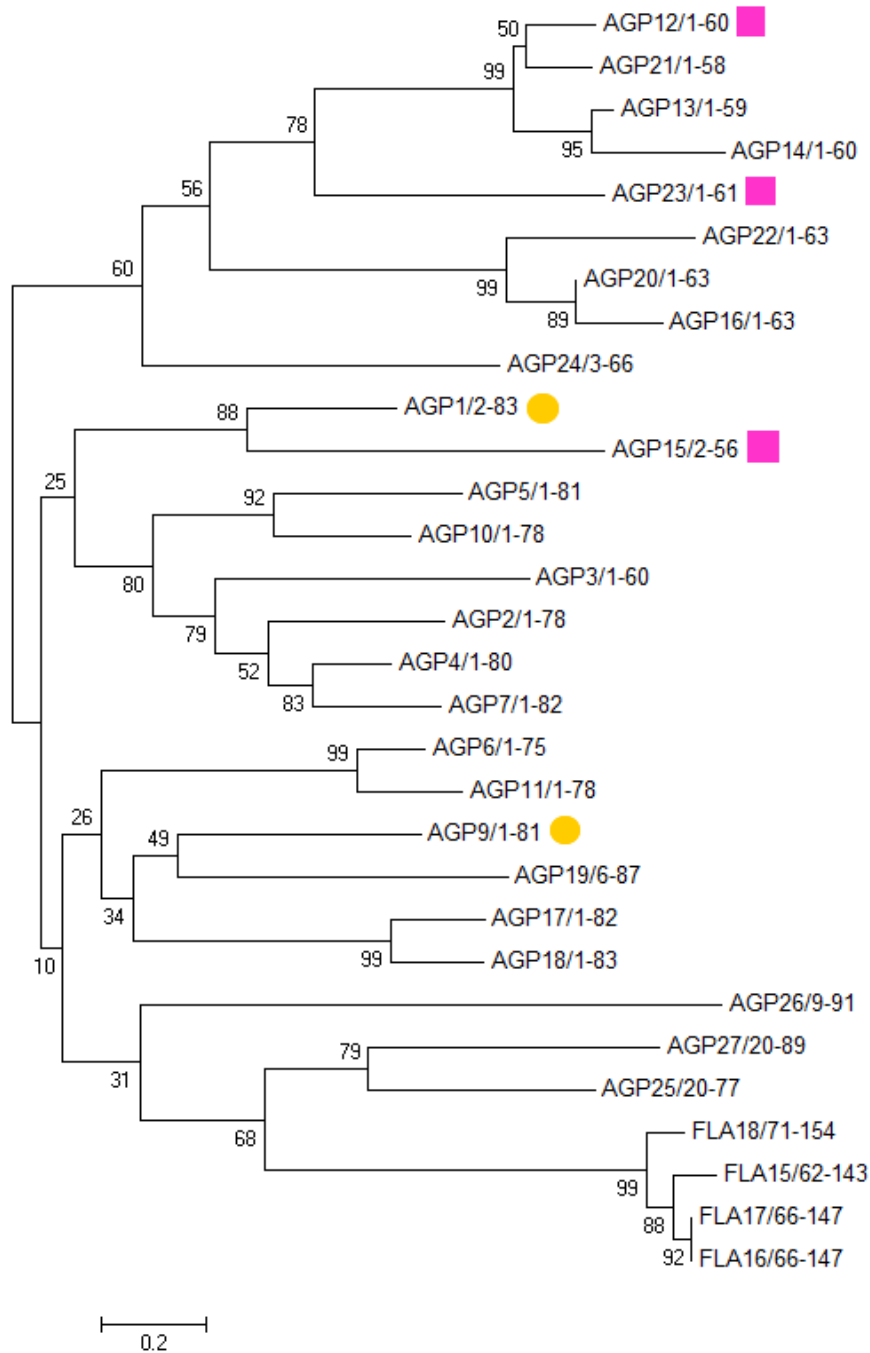

Supplemental figure 2 – Phylogenetic analysis of the AGP family in *A. thaliana*. To generate the phylogenetic tree for AGPs, the 3 blocks of most conserved amino acid sequences of AGPs coding sequences were aligned using Clustal W and manually edited using Jalview to reduce gaps. Maximum Parsimony tree was generated using the MEGA4 program. AGPs selected for further analysis are indicated by a yellow circle (classical AGPs) and a violet square (AG peptides).

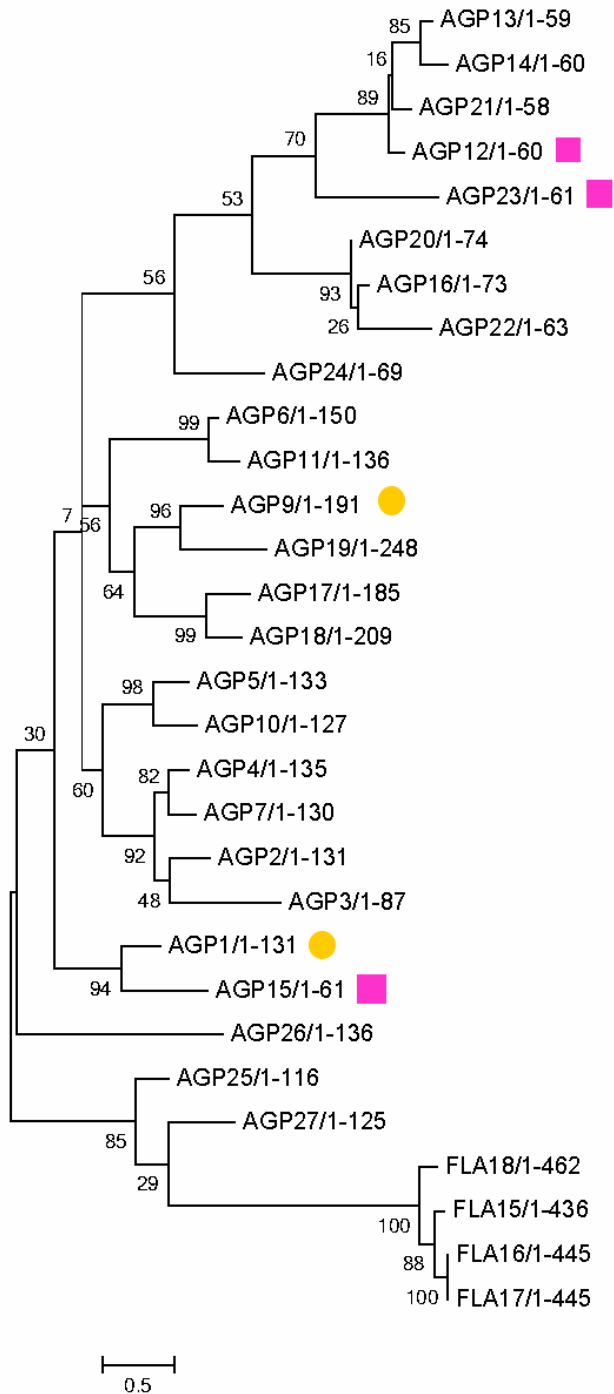

Supplemental figure 3 – The amino acid sequences of AGPs coding sequences aligned using Clustal W (Thompson *et al.*, 1994) and viewed using Jalview (Clamp *et al.*, 2004). The 3 conserved blocks are highlighted by the pink rectangles.

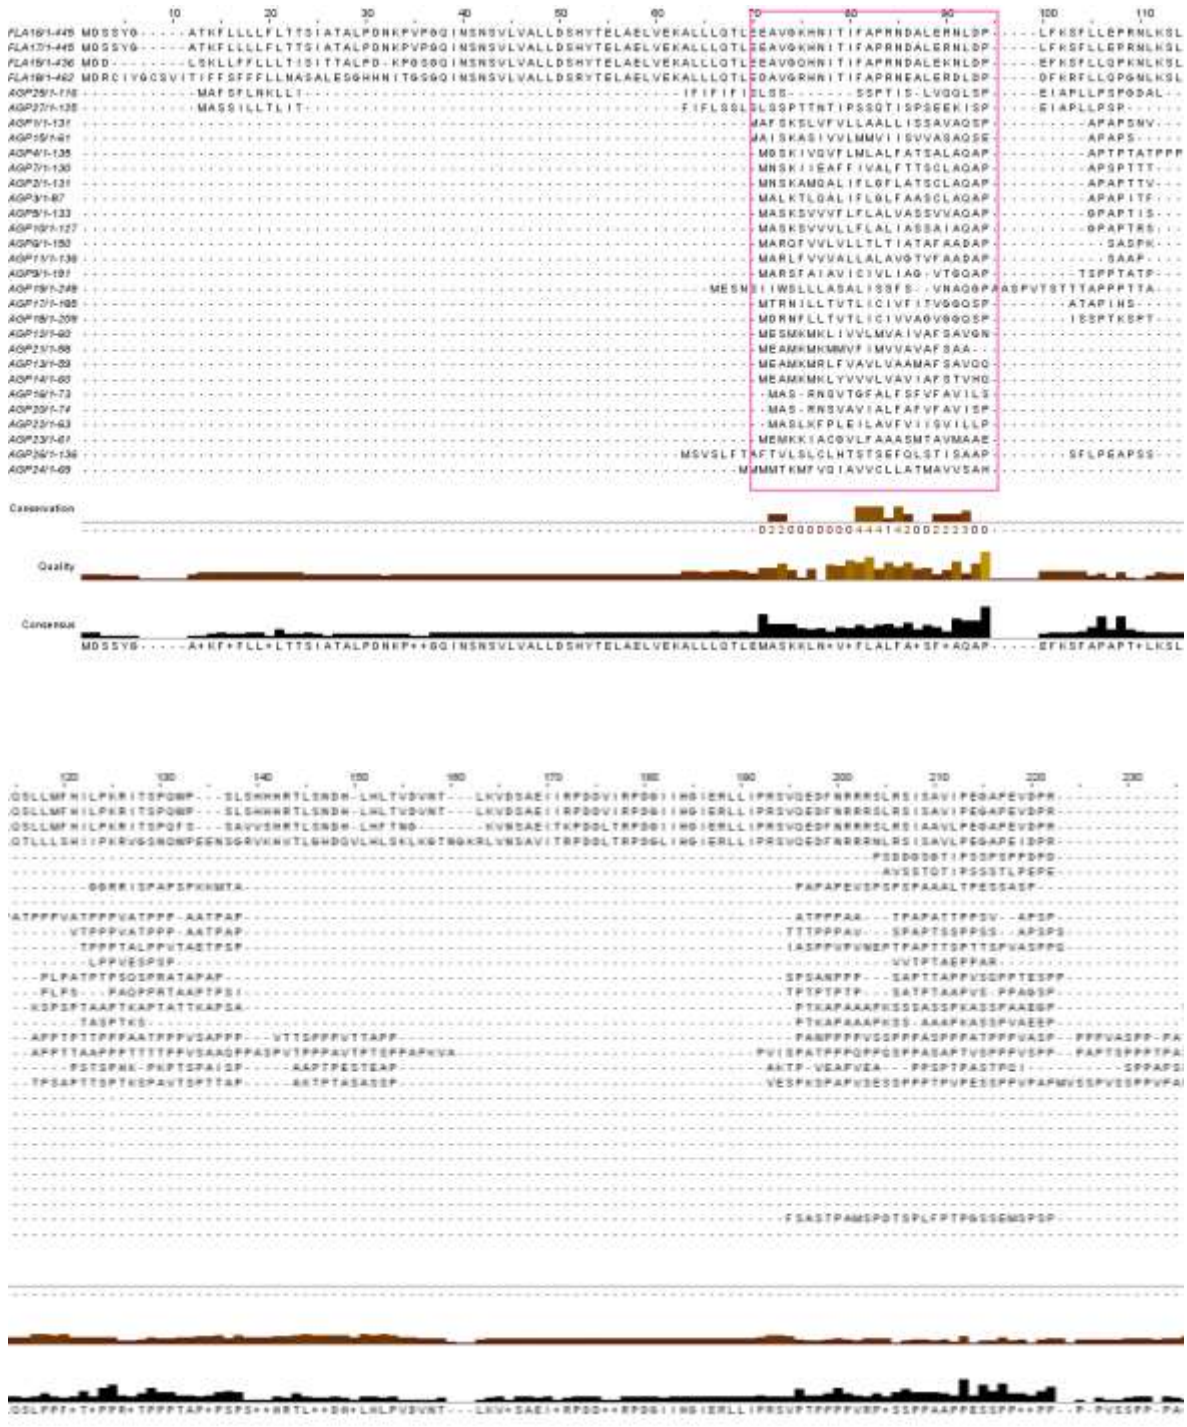

```

240      230      220      210      200      190      180      170      160      150      140      130
---THRLKK- PSPA VPA GAPP LP IVDAMS - PPSLAPAPAPGPGGPRHFGGDAQVKDFHTLLRKYGGYEMADILVNLTLATEMGRRLVSEGVV
---THRLKK- PSPA VPA GAPP LP IVDAMS - PPSLAPAPAPGPGGPRHFGGDAQVKDFHTLLRKYGGYEMADILVNLTLATEMGRRLVSEGVV
---THRLKK- PPAI PPA GAPP LP IVDAMS - PPSLAPAPAPGPGGPRHFGGDAQVKDFHTLLRKYGGYEMADILVNLTLATEMGRRLVSEGVV
---THRLKK- TAUSVPAGSPF LP IESAMA - PPSLAPAPAPGPGGAKHFGGDAQVKDFHTLLRKYGGYEMADILVNLTLATEMGRRLVSEGVV
---TRDQVDFPPLAFSPFASFP- S- SPPPPPSGAPG- LLISL I I S G S F L A L -
---PSPFLADSPFASFP- S- SLASLSSGAPG- VFIYFVYAAVYCFSLRLLAVDAI
---PSPFLADSPFASFP- S- ALSFSAIISDSPTEARPPADGGAVEMKFASTGSSAVMLFAAVLVI
---ADPTASPPAPGSP- S- A I S A S F V E - A G V A A V A A L V F G S L R I -
---ADPTASPPAPGSP- S- TVSPK- SAQPSSDAS- PAPSAAF SNAFAQTAFASIMYAVLA
---ADPTASPPAPGSP- S- SVSPGELAPTPSDASA- PPNAAALTNKAFVVGSLVAAI IYAVVLA
---TDAPAPGPAQLTP- S- TSSPA- PPDQAA- DAPSAAWANKAFVGTAVVAAALYAVVLA
---CFPYSQRTHGGS- S- NSTN- RLTPDRUAN- NFPGR- FSS-
---APRTSSTSPGAPRT- S- NVPSDE- AQAQSPLSGSPNAAAVSRVSLVGTABAVVIAALLL
---LSSASPPAPPTG- S- LTPGGAPVAGPTGSGTPVDNNNAATLA- AGSLAGFVTVASLLL
VPEDDYSASSPDSAEAPTUSGP- S- PAPTSDSIS- AADGPG- DDP- TAESPK- S- SGAUTAKF SVVTVATVQFFFFSF
TPEDDYSAGSPDSAEAPTUSGP- S- PAPTSEADGPGSSDGPSSDGPAAASGPK- S- SGAATNFKLSIAGTVAAAGFFIFSL
TPPRV-ATPPPAPLASPPAQVP- S- APAPTTKPDSPEP- S- PDSPPPLPSSDAPSPSTDSISPAPEPT- DUNDDGNSASKMVSLLVPS- VLWVMI
SPPPAPASPPPAPASPPPAPVSP- S- PVDAPS I I S L P P A P A P A P T M M R E R K H K H R H M A -
PEAGTFSAPZ I P S A D V P A P A L T - K H K H K T K - K H T A P A P G - P A S E L L P P P A P P S E A P G P P S D A F S P - A A D D G S G A O M I S V V I G M - V G A A A I A W S L L V L A F -
PVASDPPAPVAAAPVADVPAPAPS- S- K H K H T K K S H K H Q A A P A - P A P A P I P P I P P G P P V L T D P Q G T A P A P S P N T B G G K A L B O L K G R A V U M L N T G L V I L T L L A M T A -
---VAQTEAPAPSP- S- SDAAMPVPALFAS- S- VVALASGTFP- S- VUGAVATAWAVLVMAF
---TAATVEAPAPSP- S- SDAAMPVPALFAS- S- VVALASGTFP- S-
---AAVEAPAPSP- S- SDAASLIPAFFAS- S- VATLAFGFLP- S-
---TAAVDAPAPSP- S- SDAASGTFPFFAS- S- VAMMFGFFP- S-
---LAAQSLAPAPAPT- S- SDGTSIDGIAVLL- S- MUVVALVLTVMPLDASSS- YEFF
---FAAQLAPAPAPT- S- SDGTSIDGIAVLL- S- MUVVALVLTVMPLDASSS- YTF
---LAAHSSAPAPAPT- S- SDGTSIDGIAVLL- S- MUVVALVLTVMPL
---CVGAPAPGPA- S- DAASAAIPALGSLVG- S- ASLVSLSFVYLH- S-
SBSIMPTIPSSLSP- S- PNPDAVTPDRLLEVPVQSPFLPASSEVGLVSSQLSLLLVLLMLLAFCSFP- S-
GHHHNAAPAPAG- S- PASSTUVSATNMT- S- VLAIAAVALVVGSH- S-

```

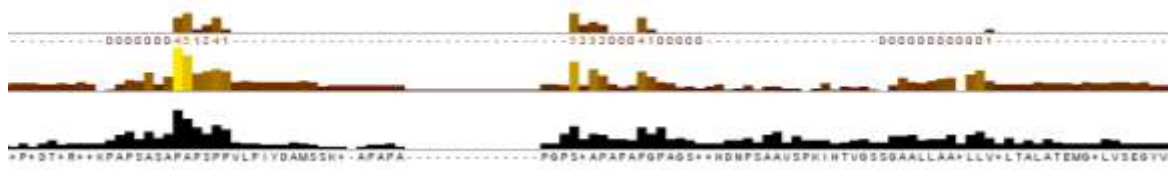

```

380      370      360      350      340      330      320      310      300      290      280      270
LTVLAPNDEAMAKLTTDQLESPGAPGIMYYHI IPEYGTESMYNAVRRFGKVKYDLSLRFPHKVLAGEADGSSVNFSGHGGSSAYLFDPSIYTDGRI SVGGIDGVLFPKEETPATEIKPAAP
LTVLAPNDEAMAKLTTDQLESPGAPGIMYYHI IPEYGTESMYNAVRRFGKVKYDLSLRFPHKVLAGEADGSSVNFSGHGGSSAYLFDPSIYTDGRI SVGGIDGVLFPKEETPATEIKPAAP
LTVLAPNDEAMAKLTTDQLESPGAPGIMYYHI IPEYGTESMYNAVRRFGKIRYDLSLRFPHKVLAGEADGSSVNFSGHGGSSAYLFDPSIYTDGRI SVGGIDGVLFPKEETPATEIKPAAP
LTVLAPNDEAMAKLTTDQLESPGAPGIMYYHI IPEYGTESMYNAVRRFGKVKYETLRFPHKVLAGEADGSSVNFSGHGGSSAYLFDPSIYTDGRI SVGGIDGVLFPKEESETVKKPTGP

```

LTVLAPNDEAMAKLTTDQLESPGAPGIMYYHI IPEYGTESMYNAVRRFGKVKYDLSLRFPHKVLAGEADGSSVNFSGHGGSSAYLFDPSIYTDGRI SVGGIDGVLFPKEETPATEIKPAAP
